# Supplementary material
Source: MDPI journal article supplement (https://www.mdpi.com/2227-9040/10/4/147)
Supplement: s1 [file s1 › chemosensors-1673044-supplementary.pdf]

# UV-activated NO<sub>2</sub> gas sensing by nanocrystalline ZnO: mechanistic insights from mass spectrometry investigations

Artem Chizhov<sup>1</sup>, Pavel Kutukov<sup>1</sup> Alexander Gulin<sup>2</sup>, Artyom Astafiev<sup>2</sup>  
and Marina Rumyantseva<sup>1\*</sup>

<sup>1</sup> Chemistry Department, Moscow State University, 119991 Moscow, Russia; chizhov@inorg.chem.msu.ru (A.C.), pavel.kutukov@chemistry.msu.ru (P.K.)

<sup>2</sup> N.N. Semenov Federal Research Center for Chemical Physics of Russian Academy of Sciences, Moscow, Russia; aleksandr.gulin@phystech.edu (A.G.), astafiev.artyom@gmail.com (A.A.).

\*Corresponding author: room@inorg.chem.msu.ru; Tel.: +74-95-939-5471

## Supplementary Information

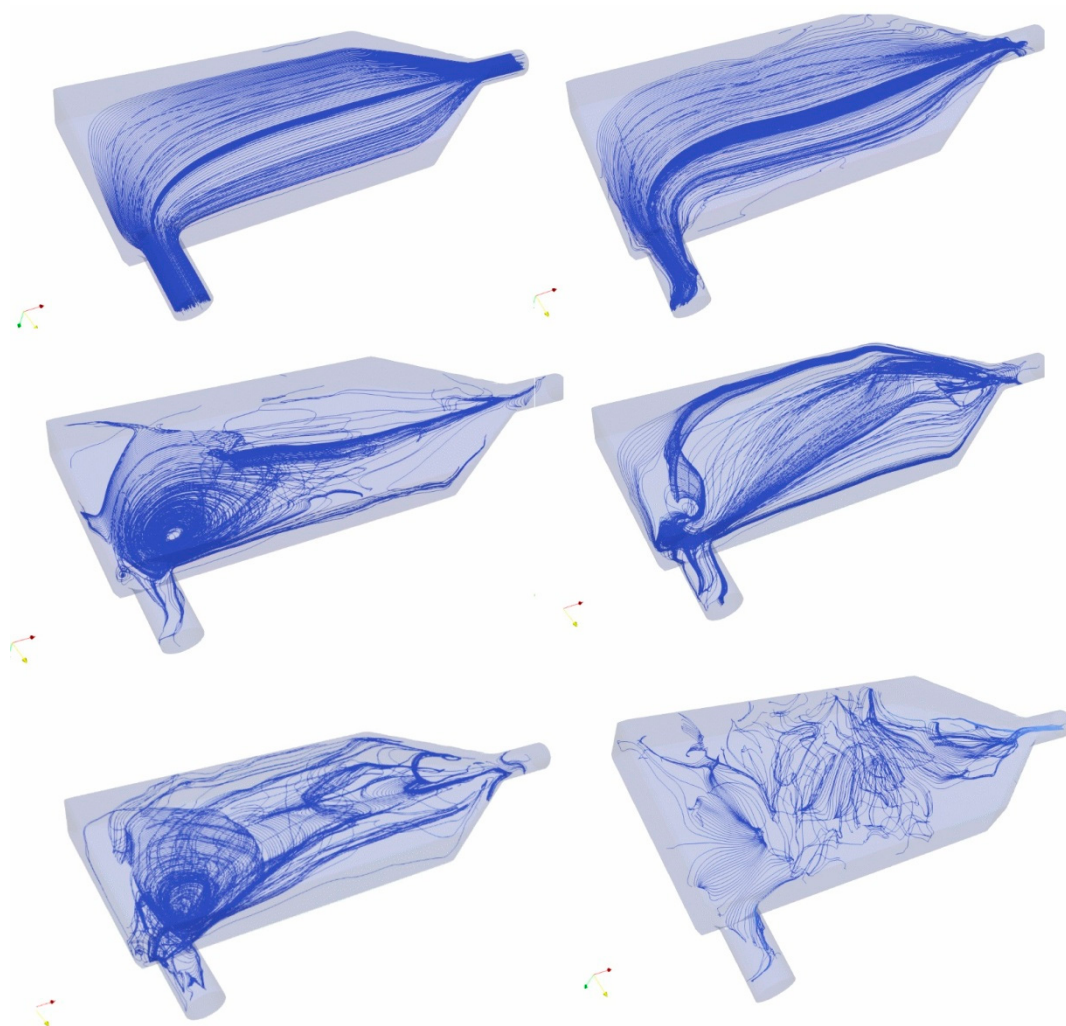

Figure S1. Simulated test chamber airflow evolution during flow rate increase from 0 to 15 mL/min computed with OpenFOAM (boundary conditions: mass flow inlet, constant

pressure outlet, no slip walls). Chosen inlet position causes vortex formation near the inlet and ensures transition to turbulent flow regime when flow rate is increased to nominal. Turbulent flow regime is essential to achieving CSTR-type (continuous stirred-tank reactor) step response of the test chamber. CSTR-type behavior eliminates potential concentration gradients, decreases dead volume of the chamber and greatly reduces sample bypass.

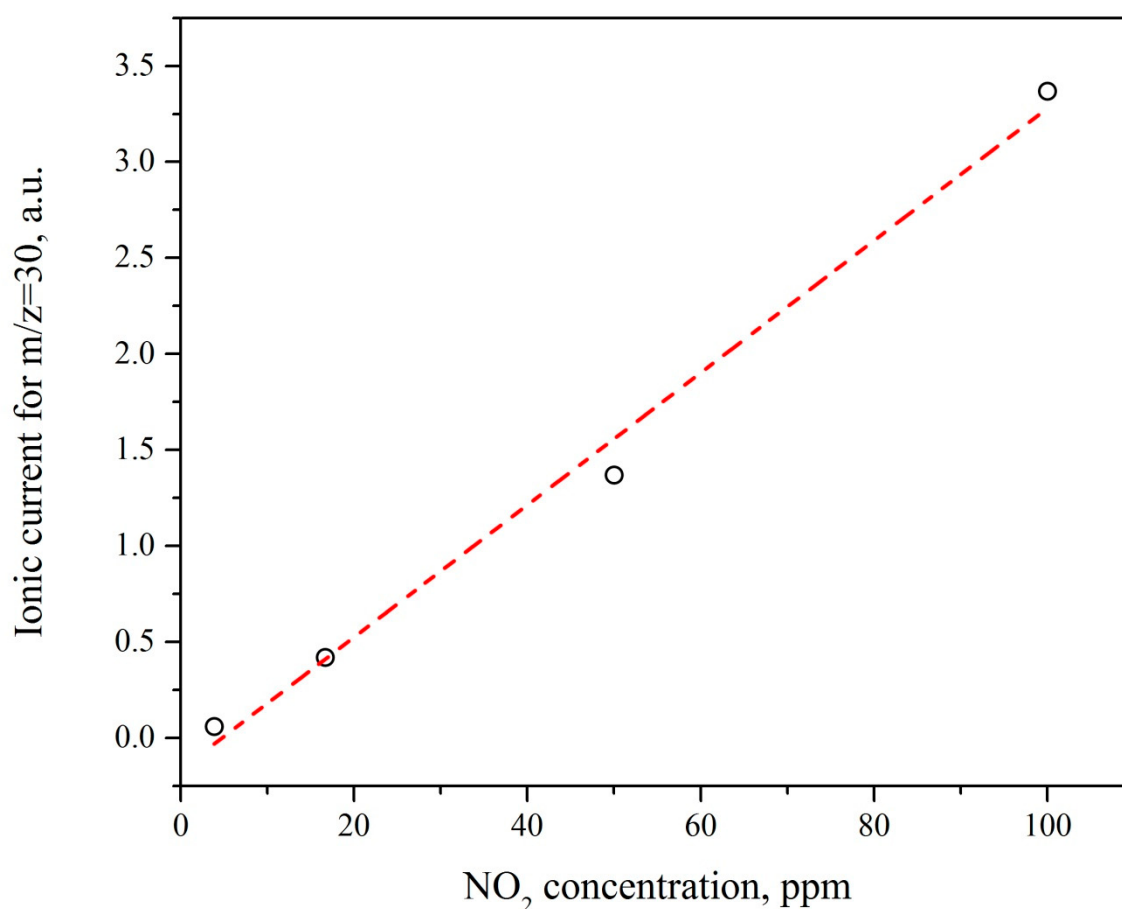

Figure S2. Calibration curve showing the relationship between the concentration of NO<sub>2</sub> in the carrier gas and the ion current by m/z=30.

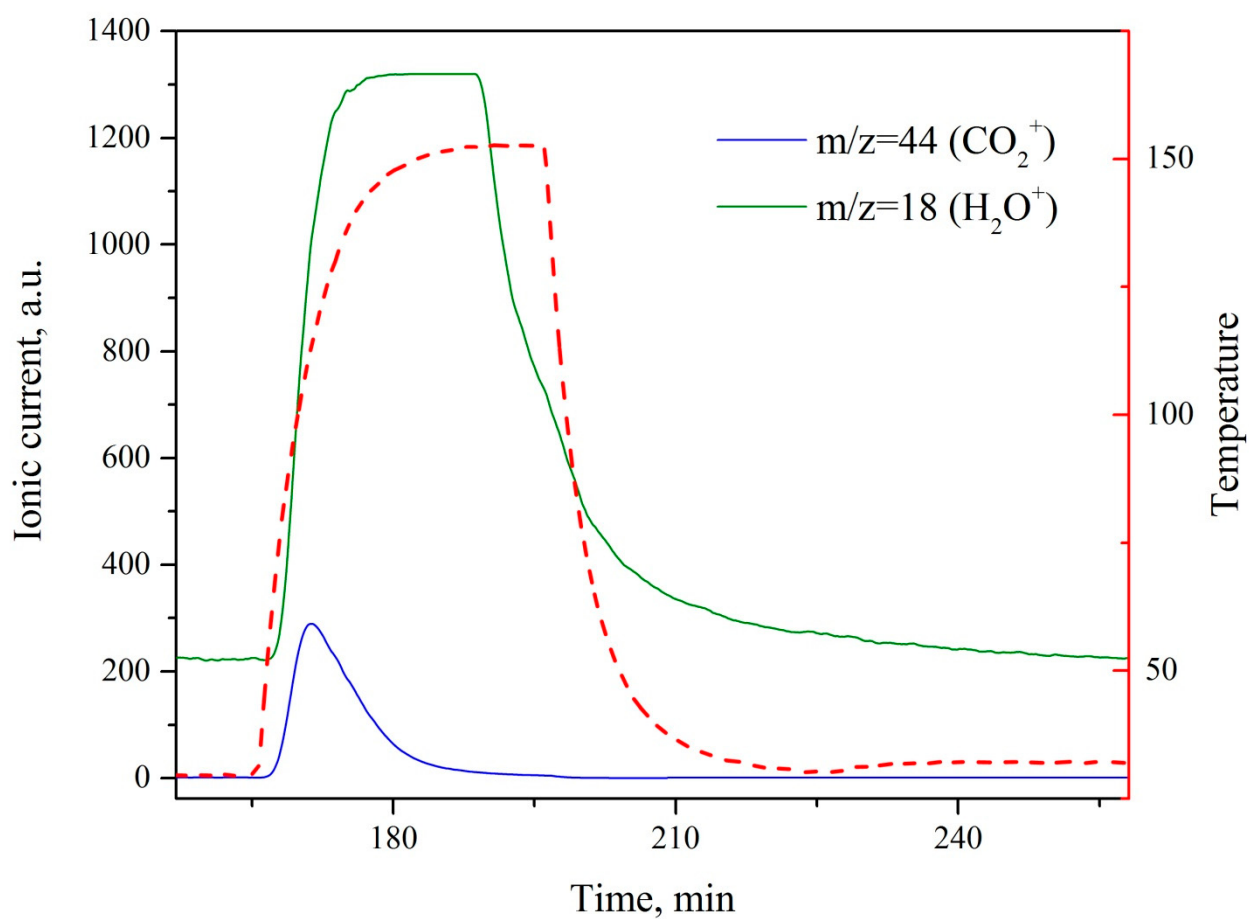

Figure S3. Thermal desorption of H<sub>2</sub>O (m/z=18 a.m.u.) and CO<sub>2</sub> (m/z=44) from ZnO-300 sample in He flow at heating up to 150 °C.
